# Supplementary material for: Development of a Ready-to-Use-Type RNA Vaccine Carrier Based on an Intracellular Environment-Responsive Lipid-like Material with Immune-Activating Vitamin E Scaffolds
Source: MDPI journal article supplement (doi:10.3390/pharmaceutics15122702), 2023-11-29
Supplement: s1 [file s1]

## Supplementary Materials

### **Development of a Ready-to-Use-Type RNA Vaccine Carrier Based on An Intracellular Environment-Responsive Lipid-Like Material with Immune-Activating Vitamin E Scaffolds**

Jessica Anindita<sup>1,2†</sup>, Hiroki Tanaka<sup>2\*†</sup>, Ryotaro Oyama<sup>1,2</sup>, Shinya Hagiwara<sup>1</sup>, Daiki Shirane<sup>1</sup>, Sakurai Taneichi<sup>3</sup>, Yuta Nakai<sup>3</sup>, Kota Tange<sup>3</sup>, Hiroto Hatakeyama<sup>1</sup>, Yu Sakurai<sup>2</sup>, Hidetaka Akita<sup>2\*</sup>

<sup>1</sup> Laboratory of DDS Design and Drug Disposition, Graduate School of Pharmaceutical Sciences, Chiba University, 1-8-1 Inohana, Chuo-ku, Chiba, 260-0856, Japan

<sup>2</sup> Laboratory of DDS Design and Drug Disposition, Graduate School of Pharmaceutical Sciences, Tohoku University, 6-3 Aoba, Aramaki, Aoba-ku, Sendai, 980-8578, Japan

<sup>3</sup> Life Science Research Laboratory, NOF CORPORATION, 3-3 Chidori-cho, Kawasaki-ku, Kanagawa, 210-0865, Japan

†These authors contributed equally to this study

\*Corresponding author:

email address: [hiroki.tanaka.e1@tohoku.ac.jp](mailto:hiroki.tanaka.e1@tohoku.ac.jp) (H. Tanaka)

Tel.: +81-22-795-6831

email address: [hidetaka.akita.e4@tohoku.ac.jp](mailto:hidetaka.akita.e4@tohoku.ac.jp) (H. Akita)

Tel.: +81-22-795-6831

**Supplementary Table S1. Detailed list of materials used in the study**

| Reagent                                                                                        | Size         | Manufacturer        | Product number |
|------------------------------------------------------------------------------------------------|--------------|---------------------|----------------|
| ssPalmE-P4C2 (COATSOME®SS-EC)                                                                  | 1 g          | NOF                 | SS-EC          |
| ssPalmE-Phe-P4C2                                                                               | 300 mg       | NOF                 | SS-EP          |
| DOPE; 1,2-dioleoyl- <i>sn</i> -glycero-3-phosphoethanolamine)                                  | 500 mg       | Avanti Polar Lipids | 850725p-500mg  |
| COATSOME®MC-8181 (DOPC; 1,2-dioleoyl- <i>sn</i> -glycero-3-phosphocholine)                     | 1 g          | NOF                 | 302-16881      |
| Cholesterol                                                                                    | 5 g          | Sigma               | C8667-5G       |
| DMG-PEG2000 (SUNBRIGHT®GM-020) (1,2-dimyristoyl-rac-glycero-3-methoxypolyethylene glycol) 2000 | 1 g          | NOF                 | GM-020         |
| Sucrose                                                                                        | 500 g        | nacalai tesque      | 30404-45       |
| DL-Malic Acid                                                                                  | 500 g        | nacalai tesque      | 21029-55       |
| Sodium Chloride                                                                                | 500 g        | nacalai tesque      | 31320-05       |
| MES (2-( <i>N</i> -morpholino)ethanesulfonic acid)                                             | 100 g        | nacalai tesque      | 02442-44       |
| HEPES (4-(2-hydroxyethyl)-1-piperazineethanesulfonic acid)                                     | 500 g        | Dojindo             | 342-01375      |
| TritonX-100 (polyoxyethylene (10) octophenyl ether)                                            | 500 mL       | FUJIFILM Wako       | 168-11805      |
| Quant-IT™ RiboGreen® RNA reagent                                                               | 1 mL         | Invitrogen          | R11491         |
| D-PBS (-)                                                                                      | 500 mL       | nacalai tesque      | 14249-24       |
| 99.5% Ethanol                                                                                  | 500 mL       | nacalai tesque      | 14713-95       |
| 99.5% Ethanol (for Molecular Biology)                                                          | 500 mL       | nacalai tesque      | 08948-25       |
| t-Butyl Alcohol                                                                                | 500 mL       | nacalai tesque      | 11714-75       |
| RNase Quiet                                                                                    | 475 mL       | nacalai tesque      | 09477-94       |
| NucleoSpin Plasmid QuickPure                                                                   | 50 reactions | MACHEREY-NAGEL      | 740615         |
| PCI (phenol: chloroform: isoamyl alcohol = 25: 24: 1)                                          | 100 mL       | nacalai tesque      | 25970-14       |
| 20 mg/mL Glycogen                                                                              | 1 mL         | nacalai tesque      | 17110-11       |
| UltraPure™ DNase/RNase-Free Distilled Water (DDW)                                              | 500 mL       | Invitrogen          | 10977-023      |
| XhoI                                                                                           | 5000 U       | NEB                 | R0146S         |
| BspEI                                                                                          | 1000 U       | NEB                 | R0540S         |
| CutSmart Buffer                                                                                | 5 mL         | NEB                 | B7204S         |
| mMESSAGE mMACHINE® T7 ULTRA Transcription kit                                                  | 50 reactions | Invitrogen          | AM1345         |
| THE RNA Storage Solution                                                                       | 1 mL × 10    | Invitrogen          | AM7000         |
| RPMI 1640                                                                                      | 500 mL       | Sigma               | R8758          |

|                                                                                                  |               |                |                    |
|--------------------------------------------------------------------------------------------------|---------------|----------------|--------------------|
| FBS (Fetal Bovine Serum)                                                                         | 500 mL        | Gibco          | 10270              |
| FCS (Fetal Calf Serum)                                                                           | 500 mL        | Hyclone        | SH30910.03         |
| 100 mM Sodium Pyruvate                                                                           | 100 mL        | nacalai tesque | 06977-34           |
| 1 mol/l HEPES                                                                                    | 100 mL        | nacalai tesque | 17557-94           |
| 55 mM 2-Mercaptoethanol                                                                          | 50 mL         | Thermo Fisher  | 21985023           |
| Penicillin/Streptomycin                                                                          | 100 mL        | nacalai tesque | 26253-84           |
| Recombinant Mouse GM-CSF                                                                         | 50 µg         | R&D SYSTEMS    | 415-ML-050         |
| G418 Sulfate                                                                                     | 5 g           | FUJIFILM Wako  | 074-05963          |
| 0.25% Trypsin/EDTA                                                                               | 500 mL        | nacalai tesque | 32777-15           |
| Red Blood Cell Lysing Buffer                                                                     | 100 mL        | Sigma          | R7757-100ML        |
| Cellstain CFSE                                                                                   | 1 mg          | Dojindo        | C375               |
| OVA H-2K <sup>b</sup> cytotoxic T-lymphocyte epitope peptide (SIINFEKL, OVA <sub>257-264</sub> ) | 100 mg        | TORAY          | Customized product |
| Dulbecco PBS (-)                                                                                 | 100 g         | Nissui         | 05913              |
| Albumin, Bovine Serum, General Grade, pH 7.0                                                     | 100 g         | nacalai tesque | 01860-07           |
| Sodium Azide                                                                                     | 500 mg        | FUJIFILM Wako  | 194-01275          |
| Poly(I:C) H.M.W                                                                                  | 10 mg         | Invivogen      | tlrl-pic           |
| Diethyl ether                                                                                    | 500 mL        | nacalai tesque | 15402-35           |
| D-Luciferin Potassium Salt                                                                       | 1 g           | FUJIFILM Wako  | 126-05116          |
| Reporter Lysis 5× Buffer                                                                         | 30 mL         | Promega        | E397A              |
| Nano-Glo® Luciferase Assay System                                                                | 10 mL         | Promega        | E1501              |
| BCA Protein Assay kit                                                                            | 500 reactions | Takara         | T9300A             |
| AmiconUltra-4-100K Centrifugal Units                                                             | 4 mL volume   | Merck          | UFC810096          |
| AmiconUltra-4-100K Centrifugal Units                                                             | 15 mL volume  | Merck          | UFC910096          |

**Supplementary Table S2. Physicochemical properties of the LNP<sub>ssPalmE-Phe</sub>(RtoU) lipid composition screening**

| No. | Variables                 | Lipid composition (%) |      |      | Size (d.nm) | Pdl  | ZP (mV) | Encapsulation (%) | Recovery (%) |
|-----|---------------------------|-----------------------|------|------|-------------|------|---------|-------------------|--------------|
|     |                           | E-Phe                 | DOPE | Chol |             |      |         |                   |              |
| 1   | Chol 10%                  | 30                    | 60   | 10   | 172.0       | 0.20 | -2.2    | 88.7              | 99.8         |
| 2   |                           | 40                    | 50   | 10   | 177.4       | 0.21 | -2.8    | 89.9              | 106.7        |
| 3   |                           | 50                    | 40   | 10   | 192.1       | 0.20 | -2.9    | 90.0              | 99.9         |
| 4   |                           | 60                    | 30   | 10   | 187.6       | 0.21 | -3.2    | 85.2              | 100.9        |
| 5   | Chol 20%                  | 30                    | 50   | 20   | 176.9       | 0.23 | -2.6    | 94.7              | 107.4        |
| 6   |                           | 40                    | 40   | 20   | 168.1       | 0.18 | -6.7    | 96.0              | 105.0        |
| 7   |                           | 50                    | 30   | 20   | 162.3       | 0.19 | -5.5    | 96.4              | 104.6        |
| 8   |                           | 60                    | 20   | 20   | 160.7       | 0.21 | -7.4    | 95.7              | 102.1        |
| 9   | Chol 30%                  | 30                    | 40   | 30   | 170.8       | 0.24 | -7.0    | 102.3             | 110.2        |
| 10  |                           | 40                    | 30   | 30   | 162.5       | 0.22 | -7.4    | 104.0             | 105.7        |
| 11  |                           | 50                    | 20   | 30   | 163.3       | 0.20 | -8.6    | 103.9             | 105.3        |
| 12  |                           | 60                    | 10   | 30   | 165.7       | 0.22 | -9.1    | 101.2             | 107.3        |
| 13  | Chol 40%                  | 30                    | 30   | 40   | 167.9       | 0.22 | -7.5    | 100.3             | 96.3         |
| 14  |                           | 40                    | 20   | 40   | 177.0       | 0.24 | -12.1   | 99.9              | 95.8         |
| 15  |                           | 50                    | 10   | 40   | 174.7       | 0.18 | -10.6   | 101.3             | 101.9        |
| 16  | Chol 50%                  | 30                    | 20   | 50   | 184.5       | 0.16 | -10.8   | 100.1             | 99.8         |
| 17  | Chol 40%;<br>DOPE 2.5-10% | 57.5                  | 2.5  | 40   | 237.9       | 0.13 | -10.0   | 99.0              | 103.0        |
| 18  |                           | 55                    | 5    | 40   | 204.2       | 0.18 | -11.3   | 100.7             | 122.9        |
| 19  |                           | 52.5                  | 7.5  | 40   | 168.4       | 0.19 | -12.5   | 96.9              | 115.6        |
| 20  |                           | 50                    | 10   | 40   | 175.2       | 0.20 | -12.1   | 97.7              | 120.5        |
| 21  | Chol 50%;<br>DOPE 2.5-10% | 47.5                  | 2.5  | 50   | 254.5       | 0.20 | -12.5   | 98.8              | 116.2        |
| 22  |                           | 45                    | 5    | 50   | 161.8       | 0.16 | -11.6   | 96.5              | 109.2        |
| 23  |                           | 42.5                  | 7.5  | 50   | 207.0       | 0.19 | -14.0   | 97.6              | 111.5        |
| 24  |                           | 40                    | 10   | 50   | 193.5       | 0.15 | -13.0   | 98.5              | 107.9        |

All compositions produced LNP<sub>ssPalmE-Phe</sub>(RtoU) with 'dented' appearance.

### Supplementary Figure S1. CTL activity of LNPs<sub>ssPalmE-Phe</sub>(RtoU) prepared with or without ultrafiltration.

The reconstitution step for the freeze-dried LNP<sub>ssPalmE-Phe</sub>(RtoU) with mRNA in aqueous solution was also optimized so as to provide further flexibility in drug preparation. After reconstitution, the residual sucrose was first removed by ultrafiltration, but this prove to not be practical and time-consuming. Therefore, we eliminated the ultrafiltration step. The vaccination activity of mRNA-LNP(RtoU) was not significantly altered even in the absence of the ultrafiltration step. Thus, the ultrafiltration in the reconstitution step was eliminated and replaced with a simpler mRNA-LNP(RtoU) preparation.

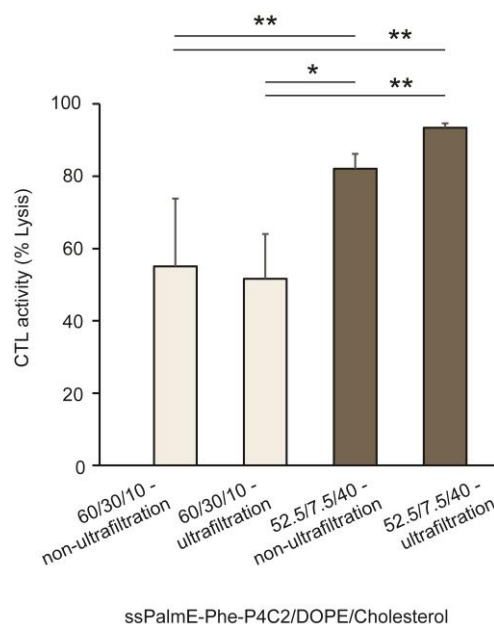

**Figure S1. CTL activity of LNPs<sub>ssPalmE-Phe</sub>(RtoU) LNP with different lipid compositions prepared with or without ultrafiltration.** CTL assay of mRNA-LNP(RtoU) was conducted in C57BL/6J mice by immunization (s.c.) with 0.1 µg of mRNA. The spleen was collected and the % lysis of splenocytes was quantified by flow cytometry. Mean with SD (n = 3), \*p<0.05, \*\*p<0.01 (one-way ANOVA followed by SNK test).

## Supplementary Figure S2. Freeze-dried appearance of LNPs<sub>ssPalmE-Phe</sub>(RtoU)

After recovering the freeze-dried LNP<sub>ssPalmE-Phe</sub>(RtoU)(s), the appearances were checked and the samples evaluated for visible cracks, dents, and collapses in front of a black background. The physical appearances of LNP<sub>ssPalmE-Phe</sub>(RtoU) were labeled as 'good', 'dent', 'crack', or 'collapse'. The LNP<sub>ssPalmE-Phe</sub>(RtoU) labeled as 'good' or 'dent' were considered to have an acceptable appearance. The LNP<sub>ssPalmE-Phe</sub>(RtoU) labeled as 'crack' indicated that the cake was brittle and that a hard solid appearance would not be maintained for a long period of time. Whereas LNP<sub>ssPalmE-Phe</sub>(RtoU) which labelled as 'collapse' indicated that the LNP formulation failed to form a dry particle after freeze-drying.

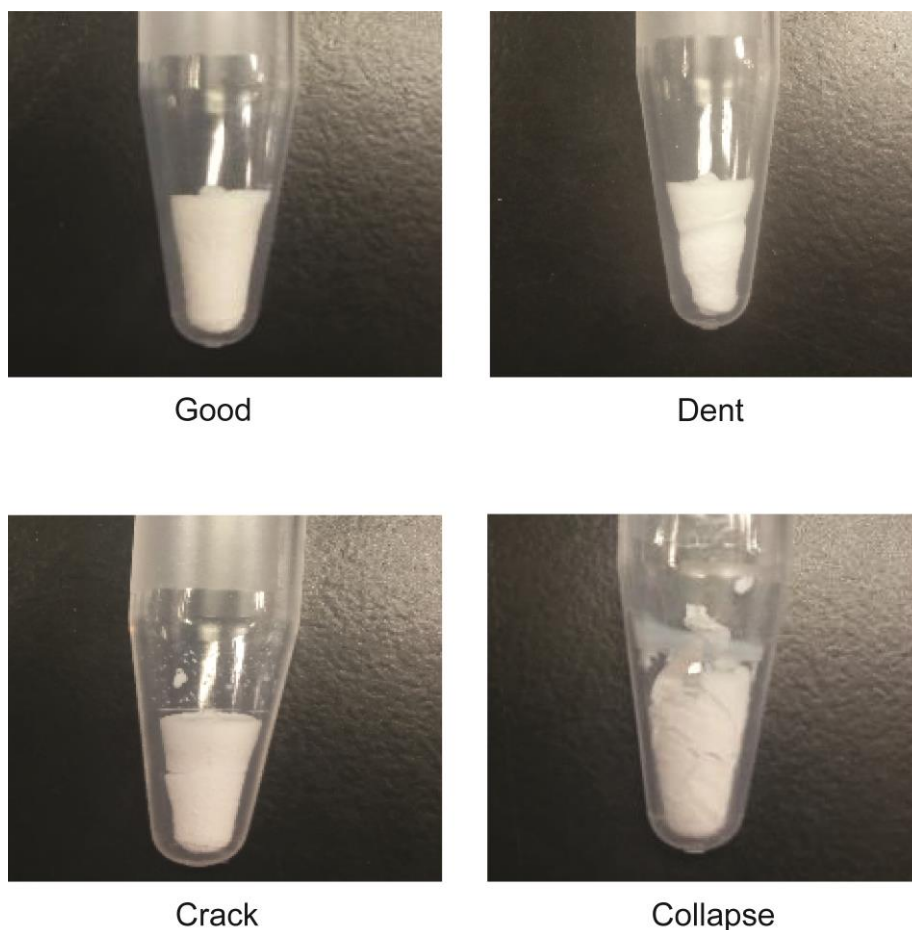

**Figure S2. Freeze-dried appearance of LNPs<sub>ssPalmE-Phe</sub>(RtoU).** The appearance of LNP<sub>ssPalmE-Phe</sub>(RtoU) was defined as good, dent, crack, or collapse (freeze-drying failure).

### Supplementary Figure S3. CTL activity of LNP<sub>ssPalmE-Phe</sub>(RtoU) prepared by various lipid compositions.

The lipid composition of the LNP<sub>ssPalmE-Phe</sub>(RtoU) was evaluated by changing the cholesterol and DOPE ratio. A total of 24 lipid compositions were evaluated (**Supplementary Table S2**) and their physicochemical properties and CTL activity were evaluated. The CTL assay results of lipid compositions with 10%, 20%, and 30% cholesterol ratio are shown in this section. Within the same cholesterol ratio (10%, 20%, or 30%), the CTL activity tended to increase by the reduction of the DOPE ratio.

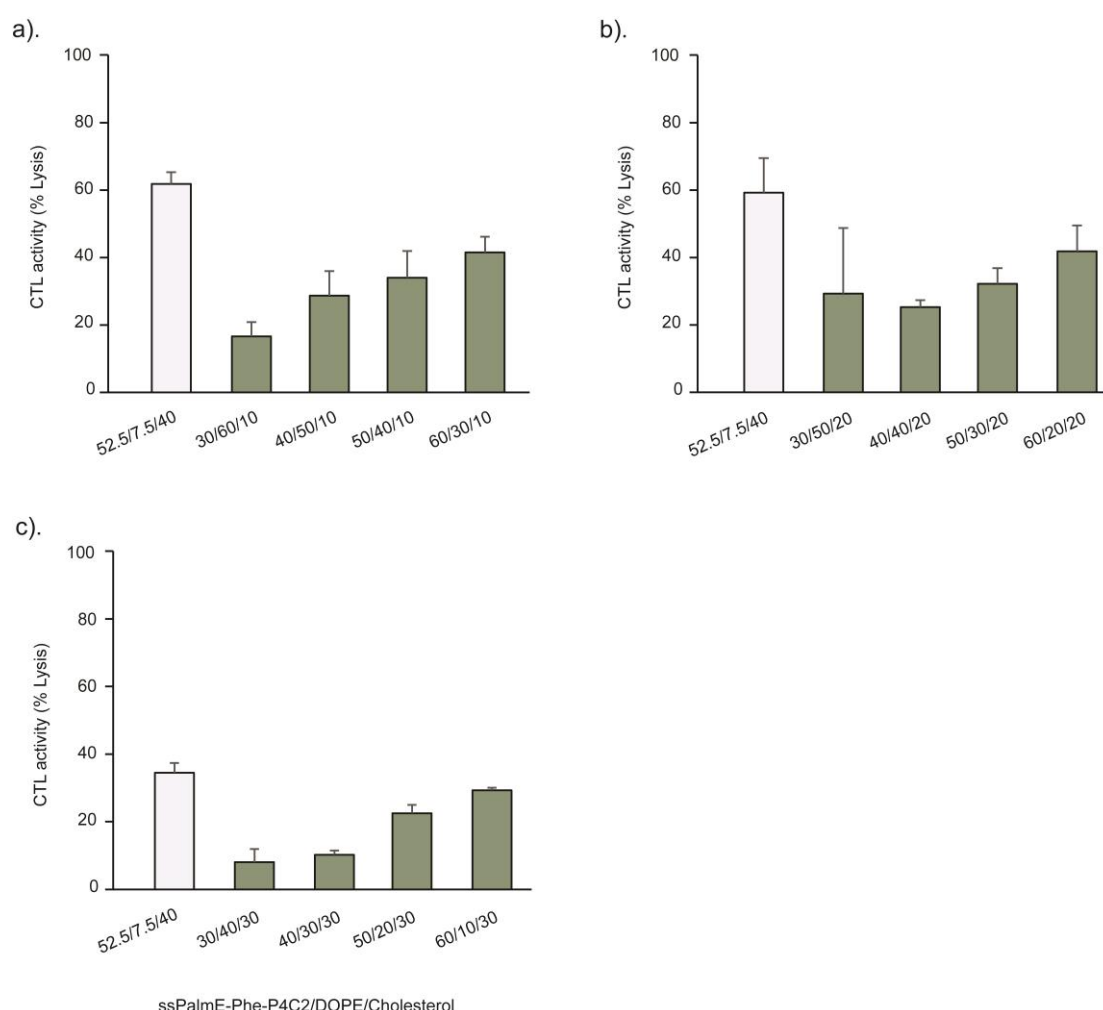

**Figure S3. CTL activity of LNP<sub>ssPalmE-Phe</sub>(RtoU) prepared by lipid compositions with fixed 10-30% cholesterol ratios.** The ssPalmE-Phe-P4C2 ratio in mOVA-LNP(RtoU) changed depending on the cholesterol and DOPE ratio. **(a)** Fixed Chol: 10%. **(b)** Fixed Chol: 20%. **(c)** Fixed Chol: 30%. CTL assay was conducted in C57BL/6J mice by immunization (s.c.) of 0.1 µg mRNA. The spleen was collected and the % lysis of splenocytes was quantified by flow cytometry. Mean with SD (n = 3), white bar: control group.
